# Supplementary material for: Species-Specific Transcriptional Regulation of Genes Involved in Nitric Oxide Production and Arginine Metabolism in Macrophages
Source: PubMed Central journal article supplement (PMC6245571; doi:10.4049/immunohorizons.1700073), 2018-01-01
Supplement: NIHMS80278-supplement-Supplementary_Figures_and_Table.pdf [file NIHMS80278-supplement-Supplementary_Figures_and_Table.pdf]

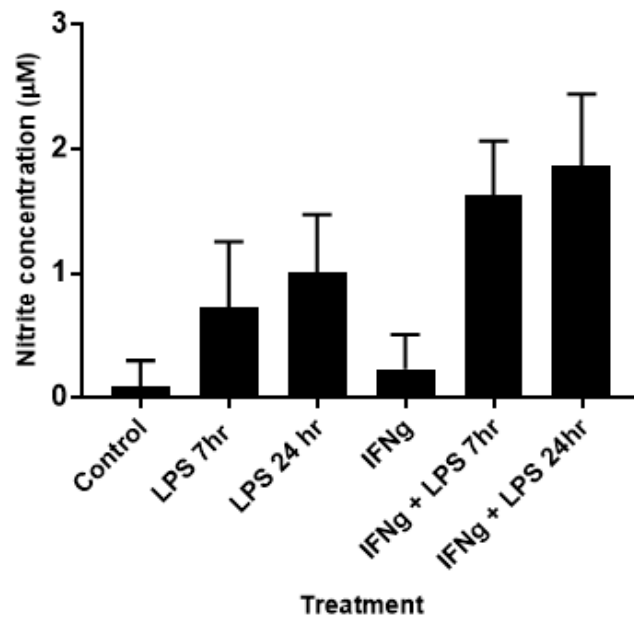

Supplementary Figure 1. IFN $\gamma$  does not significantly induce NO production in horse BMDM. Horse BMDM were stimulated with LPS at 0, 7, and 24 hr with or without IFN $\gamma$  treatment. Nitrite concentration was measured by Griess assay. T-test was performed between LPS and LPS + IFN $\gamma$  treatment at each timepoint, however differences were not statistically significant. Error bars represent the SD of the mean of triplicates.

Human SLC7A2      GA---AAATTAACAGGCTTTTACATTTGTGACTT-AATCTTATCAGAGACTCCTAAAGTAAACAATAGCGCAGTAGGAGAA  
Rat Slc7a2        TAGAAAAATAAA--GAGTTTTCACATTTGTGACTTTAATCTTATCAGAGACTCCAAAAGCAAGCAATAGCACAGAACGAGAA  
Mouse Slc7a2      TA---AAATCAA--GAGTTTTCACATTTGTGACTTTAATCTTATCAGAGACTTCTAAAGCAA---ATAGCACAGATGAAAA  
Pig SLC7A2        TA---AAATTAACAGAGTTTTCATATTTGTGTCTTTAATCTTATCAGAGACTCCTAAAGTAAACAATAGCGCAGTATGAGAA  
\*    \*\*\*\* \*    \*    \*\*\*\*\*    \*    \*    \*    \*    \*    \*    \*    \*    \*    \*    \*    \*    \*    \*    \*    \*    \*    \*

Human SLC7A2      ACCCTGATTGTGTAACCTTCTGCTCTTGCTCCCTGGAATA---ATGTCATTTCCCTA--TAAACCCACCCCAACAAT  
Rat Slc7a2        AGCTCGATTGTGTAACCTTCTGTTTTTGTGCTGGCTAGGAAATACCAAGTATCCTTTTCTT-AAAAACCCACCTCCAATAAC  
Mouse Slc7a2      ACCTCGATTGTGTAACCTTCTGTTTTTGTGCTGGCTATGAAATACCAAGTATCCTGTTCTTTAAAAACCCACTTCCAATAAC  
Pig SLC7A2        AACTTGGTTGTGTAACCTTTG-----GAAATAGCAAATGTCGCTTTCTT--ATAGCTCGCCTTAAGTCAT  
\*    \*    \*    \*\*\*\*\*    \*    \*    \*    \*    \*    \*    \*    \*    \*    \*    \*    \*    \*    \*    \*    \*

Human SLC7A2      CGTGACTACGTATTTCATACCCTGGAGTCTTCCAAAATAGCAACTGCACATTA-----TTTATCAA  
Rat Slc7a2        CGTGACTGCCTGCCTGCTTATTCACAAGTCT-----GAAGTCTCGAGTTTTGCTTTTCACTAT-----GATTTTCATTAC  
Mouse Slc7a2      CATGACTATG-ACCTGCCTATTCACAGTCT-----GGAATCTTCAAGTTTG-----ATTTTCATTAC  
Pig SLC7A2        CAGGTCTACCTGTTCACTTCACTGGGACTTTCCAA-ATAGCAACTAAATATTGCAATAAACGGTTTACAGGTTTATTATGG  
\*    \*    \*    \*    \*    \*    \*    \*    \*    \*    \*    \*    \*    \*    \*    \*    \*    \*    \*    \*    \*    \*

Human SLC7A2      CGTTTAGTTTGCATTT-GACAAAGCACATCCACCTGGGCTTCCATTTATCATTTGCTATTATATATATTTATATATTTT  
Rat Slc7a2        AGAAGTGATACTTTT-GACAAAGCACATCTATCTAGGCTTCT-----AGTTTTATATAATCATATACACTACTATTTT  
Mouse Slc7a2      AGAAGTGATACTTTTAAACAAGCATCATCTATCTGGGCTTCT-----AGTTTTATATATATATACTACTACTATTTT  
Pig SLC7A2        TGAAA-TAATACTATTGACAAAGCACTCCCATCTGGGTTCTTTTATCAGAGGTCGTTGTTATATTTTACATATATTTT  
\*    \*    \*    \*    \*    \*    \*    \*    \*    \*    \*    \*    \*    \*    \*    \*    \*    \*    \*    \*    \*    \*

Human SLC7A2      CTTATTTCCAAAATCT--TTGTAGAATGGAAGTAAACGGGGGAC-----CAAACCCCACTT  
Rat Slc7a2        TATGTTCCCAATCTCAATGAGAGAGT-----GAGGGAAAGAGGGAGGGAGAGGAAACAAAATCTTGCTT  
Mouse Slc7a2      TATGTTCCCAATCTCAATGAGAGAGGGAGAGAAAGAGGGAGGGAGAGGAAAGAGAAAGAAATCCTGCTT  
Pig SLC7A2        CTTATTTACAAAATCC--TCGCAGACTAAAACCTAAATCAAGTCAG-----GGACAAAATCCCACCT  
\*    \*    \*    \*    \*    \*    \*    \*    \*    \*    \*    \*    \*    \*    \*    \*    \*    \*    \*    \*    \*    \*

Human SLC7A2      A---GAACTCTGCTTAGAAGATTCGGAATGCCCTTG-----AGGTTTGGTCTCCAGGAGAGCAGCAA  
Rat Slc7a2        AGAAGAAACCT-CAGAAATGCCCTGCCCCACCCCCACACACACATTGAGATTGGGTTCTGCCAAGAGA----GC  
Mouse Slc7a2      AGAAGAAACCT-CAGAAATGCCCCACCCACCCCC-----AGATTGGGTTCTGCCAAGGAAAAGGGGC  
Pig SLC7A2        GAAGGAACCTCTGCTTAGAAGCCTCGGAGATGGCCCTG-----AGTTTGGGTCCT-CATGGAAGGCAAGA  
\*    \*    \*    \*    \*    \*    \*    \*    \*    \*    \*    \*    \*    \*    \*    \*    \*    \*    \*    \*    \*    \*

Human SLC7A2      GTTTATCTCGCGCGCAG-----CCTCTCTTCCCGCGCCCGCGCCACCG-----GCCTAGCCCGGGG  
Rat Slc7a2        GTTTTCCCTCTGCCAAG-----CCCTGCGTCTCGGACCCAGCCCAACC-----ACCTACCCACCCAGC---GAG  
Mouse Slc7a2      ATTTCCCTCTGCCAAA-----CCCTGCGTCTCGGACCCAGCCCAACC-----ACC-----CCAGC---GGG  
Pig SLC7A2        ATTCACCTCGGCTGGGTGTGCCCTCTCCCGCCCGACCTGCCCCACTGCTCTCGGAGCCACCCGCCAGCCCAAGG  
\*    \*    \*    \*    \*    \*    \*    \*    \*    \*    \*    \*    \*    \*    \*    \*    \*    \*    \*    \*    \*    \*

Human SLC7A2      CTAGCGCCCGC-CCACGTGTGCTCGGCTCCAGGCA--AACCCG-----CTGAGCAGCGCGCCGACACCCGCCACC  
Rat Slc7a2        CAAGCTTGTA-CCACGTGTGCTTACACCTGGCCCTGACCCTA-----CAGAGGCGCGGAG-CTAGACACCCGCTTCC  
Mouse Slc7a2      CAAGCGTGAATCCACGTGCGCGCGCCCTGATCTGACCTGACCTTTTTCAGAAGCTTGGAG-TTAGACACCCGCTTCC  
Pig SLC7A2        CAAGCGCACGC-CCACGTGTGCTCACCGCTCGGGAGGGAGACTGAAC---TAGCGGCGTTGCGACCGGACCCGCTTACC  
\*    \*    \*    \*    \*    \*    \*    \*    \*    \*    \*    \*    \*    \*    \*    \*    \*    \*    \*    \*    \*    \*

Human SLC7A2      CCGGGGATTGGTTCAGCGCGGCGG--GGCCCGCGGGGAGGCGGGCTC-GGGGTCGCGTTCCGGGAGCGCGGAGGAGGGC  
Rat Slc7a2        T-GGAATCT---CAGCGTGCCTG-----GAGGGGACGAGCGCTCCAGGAGGGGTCGCGAGCCGAGGGAGGGGCGG  
Mouse Slc7a2      T-GGAGTCT---CTGCGCGCCCGCCCGGAGCCGTGACAAAGCTCCAGGCGAGGGTTCGCGAGCACGAGGGAGGGGCGG  
Pig SLC7A2        C-CAGGATTGCGCGCGCGGTGG-----GGCGGAGGCGGGCTCGGGTGGGGGGTCTGAGAGCGCGGAGAGAGAA  
\*    \*    \*    \*    \*    \*    \*    \*    \*    \*    \*    \*    \*    \*    \*    \*    \*    \*    \*    \*    \*    \*

Human SLC7A2      TGCCGCC-----GGCCCGC-GCCCGCC-----CCGCCCGG-GTGGCTACACAGAGG-----  
Rat Slc7a2        AACGCCCTGCCCTCAGGCCCGCCCTCGCGGCCCGCC---TTGCCCCGCCCTCCGCTTCTACTCAGAGGGTTGC  
Mouse Slc7a2      GACGGCC-----CCGCCCTCGCTGCCCGCCCACTCCGCCCGCCCTCCGCTTCTACTCAGAGG-----  
Pig SLC7A2        GGGGGCG-----GTTCCACCCGGGACGCCCGCC-----CCGGCGCGGTACACCAGCT-----  
\*    \*    \*    \*    \*    \*    \*    \*    \*    \*    \*    \*    \*    \*    \*    \*    \*    \*    \*    \*    \*    \*

Human SLC7A2      ---GCGCCACGTGCCAGCCC  
Rat Slc7a2        CCACGTGCCACGTGCCAGCCC  
Mouse Slc7a2      ---GTGCCACGTGCCAGCCC  
Pig SLC7A2        ---GCGCCACGTGCCAGTCC  
\*    \*\*\*\*\*    \*

Supplementary Figure 2. Alignment of proximal promoters of SLC7A2 in multiple species. Promoter sequences were downloaded from ENSEMBL. The last base corresponds to the peak of transcription initiation for the gene in mouse and human based upon the data from the FANTOM Consortium (Ref 10) on the Zenbu browser (<http://fantom.gsc.riken.jp/zenbu/>). Red highlight indicates the purine-rich element highlighted in Ref 31, which is not conserved in rat. However, note that both species have at least two candidate PU.1 sites containing the GGAA core (underlined).

Supplementary Table 1. Source of reference transcripts for RNA-seq processing.

| Species                                  | Genome version    | Source               | URLs                                                                                                                                                                                                                                                                                                                                                                                                                                                                                                                                                                                                                                                                                                            | No. of transcripts used as input for the first pass kallisto index | No. of transcripts not detected in any round after the first round of quantification with kallisto * | Avg. no. of protein-coding genes (TPM > 1) in BMDMs 0 hr post-LPS | Avg. no. of protein-coding genes (TPM > 1) in BMDMs 7hr post-LPS | Avg. no. of protein-coding genes (TPM > 1) in BMDMs 7hr post-LPS | % of protein-coding genes (TPM > 1) in BMDMs 7hr post-LPS |
|------------------------------------------|-------------------|----------------------|-----------------------------------------------------------------------------------------------------------------------------------------------------------------------------------------------------------------------------------------------------------------------------------------------------------------------------------------------------------------------------------------------------------------------------------------------------------------------------------------------------------------------------------------------------------------------------------------------------------------------------------------------------------------------------------------------------------------|--------------------------------------------------------------------|------------------------------------------------------------------------------------------------------|-------------------------------------------------------------------|------------------------------------------------------------------|------------------------------------------------------------------|-----------------------------------------------------------|
| Cattle ( <i>Bos taurus</i> )             | UMD 3.1           | Ensembl (version 83) | [1] protein-coding, pseudogene and processed pseudogene transcripts downloaded from: <a href="http://ftp.ensembl.org/pub/release-83/ratatosk_taurus/cdna/Bos_taurus.UMD3.1.cdna.all.a.gz">http://ftp.ensembl.org/pub/release-83/ratatosk_taurus/cdna/Bos_taurus.UMD3.1.cdna.all.a.gz</a> ; [2] non-protein coding transcripts obtained from Ensembl Biomat, filtered by type: lncRNA, miRNA, misc. RNA, Mt. RNA, Mt. lRNA, mt. rRNA, snRNA, snoRNA, sRNA                                                                                                                                                                                                                                                        | 26,740                                                             | 5,050                                                                                                | 11,940                                                            | 59,72                                                            | 11,276                                                           | 56.4                                                      |
| Goat ( <i>Capra hircus</i> )             | ARSI              | NCBI                 | <a href="http://ftp.ncbi.nlm.nih.gov/genomes/all/GCF/001704/415/GCF_001704415.1_ARSI/GOE_001704415.1_ARSI_mrna.gz">http://ftp.ncbi.nlm.nih.gov/genomes/all/GCF/001704/415/GCF_001704415.1_ARSI/GOE_001704415.1_ARSI_mrna.gz</a><br>[1] protein-coding, pseudogene and processed pseudogene transcripts downloaded from: <a href="http://ftp.ensembl.org/pub/release-89/ratataequus_caballus/cdna/Equus_caballus.EquCab2.cdna.all.a.gz">http://ftp.ensembl.org/pub/release-89/ratataequus_caballus/cdna/Equus_caballus.EquCab2.cdna.all.a.gz</a> ; [2] non-protein coding transcripts obtained from Ensembl Biomat, filtered by type: lncRNA, miRNA, misc. RNA, Mt. RNA, Mt. lRNA, mt. rRNA, snRNA, snoRNA, sRNA | 47,193                                                             | 964                                                                                                  | 11,875                                                            | 62,96                                                            | 11,662                                                           | 61.83                                                     |
| Horse ( <i>Equus caballus</i> )          | EquCab 2.0        | Ensembl (version 85) | [1] protein-coding, pseudogene and processed pseudogene transcripts downloaded from: <a href="http://ftp.ensembl.org/pub/release-90/ratataequus_caballus/cdna/Equus_caballus.EquCab2.cdna.all.a.gz">http://ftp.ensembl.org/pub/release-90/ratataequus_caballus/cdna/Equus_caballus.EquCab2.cdna.all.a.gz</a> ; [2] non-protein coding transcripts obtained from Ensembl Biomat, filtered by type: lncRNA, miRNA, misc. RNA, Mt. RNA, Mt. lRNA, mt. rRNA, snRNA, snoRNA, sRNA                                                                                                                                                                                                                                    | 29,196                                                             | 4,350                                                                                                | 11,622                                                            | 66,83                                                            | 11,304                                                           | 55.28                                                     |
| Pig ( <i>Sus scrofa</i> )                | Sscrofa 11.1      | Ensembl (version 90) | [1] protein-coding, pseudogene and processed pseudogene transcripts downloaded from: <a href="http://ftp.ensembl.org/pub/release-90/ratataequus_caballus/cdna/Equus_caballus.EquCab2.cdna.all.a.gz">http://ftp.ensembl.org/pub/release-90/ratataequus_caballus/cdna/Equus_caballus.EquCab2.cdna.all.a.gz</a> ; [2] non-protein coding transcripts obtained from Ensembl Biomat, filtered by type: lncRNA, miRNA, misc. RNA, Mt. RNA, Mt. lRNA, mt. rRNA, snRNA, snoRNA, sRNA                                                                                                                                                                                                                                    | 49,436                                                             | 8,881                                                                                                | 12,732                                                            | 66,99                                                            | 12,316                                                           | 55.12                                                     |
| Rat ( <i>Rattus norvegicus</i> )         | Rnor 6.0          | Ensembl (version 88) | [1] protein-coding, pseudogene and processed pseudogene transcripts downloaded from: <a href="http://ftp.ensembl.org/pub/release-88/ratataequus_caballus/cdna/Equus_caballus.EquCab2.cdna.all.a.gz">http://ftp.ensembl.org/pub/release-88/ratataequus_caballus/cdna/Equus_caballus.EquCab2.cdna.all.a.gz</a> ; [2] non-protein coding transcripts obtained from Ensembl Biomat, filtered by type: lncRNA, miRNA, misc. RNA, Mt. RNA, Mt. lRNA, mt. rRNA, snRNA, snoRNA, sRNA                                                                                                                                                                                                                                    | 47,106                                                             | 13,162                                                                                               | 11,843                                                            | 53,23                                                            | 11,588                                                           | 51.99                                                     |
| Sheep ( <i>Ovis aries</i> )              | Oar 3.1           | Ensembl              | [1] protein-coding, pseudogene and processed pseudogene transcripts downloaded from: <a href="http://ftp.ensembl.org/pub/release-83/ratataequus_caballus/cdna/Equus_caballus.EquCab2.cdna.all.a.gz">http://ftp.ensembl.org/pub/release-83/ratataequus_caballus/cdna/Equus_caballus.EquCab2.cdna.all.a.gz</a> ; [2] non-protein coding transcripts obtained from Ensembl Biomat, filtered by type: lncRNA, miRNA, misc. RNA, Mt. RNA, Mt. lRNA, mt. rRNA, snRNA, snoRNA, sRNA                                                                                                                                                                                                                                    | 29,118                                                             | 193                                                                                                  | 12,409                                                            | 69,31                                                            | 12,222                                                           | 58.42                                                     |
| Water buffalo ( <i>Bubalus bubalis</i> ) | UMD_CASPUr_WB 2.0 | NCBI                 | <a href="http://ftp.ncbi.nlm.nih.gov/genomes/all/GCF_000471/251/GCF_000471251.1_UMD_CASPUr_WB_2.0_mrna.gz">http://ftp.ncbi.nlm.nih.gov/genomes/all/GCF_000471/251/GCF_000471251.1_UMD_CASPUr_WB_2.0_mrna.gz</a>                                                                                                                                                                                                                                                                                                                                                                                                                                                                                                 | 46,502                                                             | 99                                                                                                   | 10,659                                                            | 63,17                                                            | 9,879                                                            | 49.28                                                     |

\* note that ENSEMBL data for the sheep, water buffalo and goat are derived from large-scale expression atlases for each species, each comprising hundreds (goat) or thousands (sheep, water buffalo) of libraries spanning multiple tissues and cell types. For these species, therefore, there are few transcripts undetected in every library of their respective atlas.
